# Supplementary material for: Annual global gridded livestock mapping from 1961 to 2021
Source: Copernicus journal article supplement (doi:10.5194/essd-2025-175), 2025-04-09
Supplement: Supplementary file [file essd-2025-175-AC1-supplement.pdf]

We would like to thank the editor and reviewers very much for the valuable comments and suggestions that greatly helped us to improve the manuscript. Thank you very much for your time and efforts. In this revised version, we have addressed all reviewer comments in detail. Major revisions include: (1) refining the discussion on data uncertainty and variable importance, especially regarding vegetation features and anthropogenic drivers; (2) incorporating Partial Dependence Plot (PDP) analyses to improve the interpretability of the models; (3) clarifying the rationale behind the use of suitability masks and addressing concerns about land cover assumptions; (4) explaining the variation in prediction accuracy across species. We believe these revisions have substantially strengthened the scientific rigor, clarity, and transparency of the manuscript.

**Reviewer #1:**

***Comment 1.*** The authors rely on FAOSTAT's national-level livestock statistics as the primary data source for mapping. While these data span a long temporal range (1961–2021), their spatial resolution is generally coarse. Deriving gridded datasets primarily based on these national statistics may introduce substantial spatial uncertainty, as livestock distributions exhibit strong intra-national heterogeneity (<https://doi.org/10.1016/j.oneear.2023.08.012>; <https://doi.org/10.1016/j.rse.2019.111301>). And this issue could be particularly pronounced in large, transhumant livestock nations such as the United States, China, Brazil, and India.

**Response:** Thanks for the comment. We agree that national-level statistics, such as those from FAOSTAT, are spatially coarse and do not capture intra-national heterogeneity. To mitigate this limitation, we implemented a spatial downscaling approach that uses the GLW4 dataset as a baseline to proportionally allocate FAOSTAT's national totals to the city level. Specifically, we calculated city-level livestock proportions from the GLW4 density maps and used these proportions to rescale the annual national totals from FAOSTAT. This method enables us to generate subnational reference distributions for both sample generation and model correction (as the reviewer kindly pointed out in Comment 3).

We acknowledge that this method inherits the assumption of spatial stability in livestock distributions over time. To evaluate this, we conducted validation using multi-year subnational statistics (Figures 5 and 6), which showed that the resulting spatial-temporal patterns aligned well with observed dynamics at both provincial and county levels. For further details and supporting literature, we kindly refer the reviewer to our response to Comment 3.

***Comment 2.*** As noted in the discussion (Lines 281–290, Figure 8), the authors indicate that adopting finer-scale livestock statistics (e.g., municipal or county-level) is one of the most effective methods to reduce uncertainties. In fact, numerous studies have already leveraged such high-resolution data to develop regional spatial datasets, such as <https://www.nature.com/articles/s41597-024-03072-y>; <https://doi.org/10.5194/essd-13-515-2021>. A recent study even compiled over 50,000 fine-scale records for global

*livestock mapping (<https://doi.org/10.21203/rs.3.rs-6201916/v1>). Compared to these efforts, what advantages does this study offer in uncertainty control?*

**Response:** We thank the reviewer for pointing us to the valuable references, which represent significant progress in high-resolution livestock mapping. We fully agree that finer-scale statistical records (e.g., municipal or county-level) are essential for reducing uncertainty in livestock distribution estimates. However, while such fine-resolution datasets are increasingly available for selected regions and recent years, it remains very difficult to obtain globally consistent, spatially harmonized, and temporally comparable high-resolution statistics across multiple decades. Most available fine-scale data, even within a single country, are limited in temporal coverage, vary in format and definitions, and are difficult to standardize for use in long-term global mapping. In contrast, FAOSTAT provides the globally consistent livestock statistics from 1961 onward, albeit at the national level.

In this context, the main advantages of our study in terms of uncertainty control are as follows: (1) By using a uniform, global input source (FAOSTAT) and consistent modeling procedures, we ensure that interannual changes in livestock distribution are comparable and not confounded by inconsistent data sources. (2) Our study not only acknowledges uncertainty but also evaluates it at multiple levels—model performance (Fig. 4), spatial consistency with fine-scale statistics (Fig. 5, Fig. 8), and feature sensitivity (Fig. 7). This multi-level assessment helps identify which inputs and assumptions are driving spatial or temporal uncertainty. (3) While our current product is based on national statistics, we demonstrated in Figure 8 that integrating finer-scale statistics (e.g., Chinese county-level pig data) improves spatial allocation accuracy. This shows that our framework can flexibly incorporate finer data wherever available, without losing global scalability.

In summary, while regionally detailed maps are valuable, our contribution lies in producing the first globally consistent, annually gridded livestock dataset covering 61 years, with built-in mechanisms for uncertainty evaluation and integration with finer-scale data in future updates. We believe this temporal and methodological robustness offers a distinct and complementary advantage to existing efforts.

***Comment 3.** The authors mention using GLW4 to downscale FAOSTAT's national statistics to municipal (city) scales (Lines 117–119), yet the specific methodology remains unclear. Is the process based on calculating municipal proportions from GLW4 data and then scaling national totals by these proportions? If so, this approach may inherit significant uncertainties, as municipal proportions can vary substantially over time.*

**Response:** Thanks for the comment. Yes, the reviewer is correct in interpreting our approach: we used the livestock density distributions from the GLW4 dataset to calculate municipal-level proportions, and then applied these proportions to redistribute FAOSTAT national totals to a finer administrative scale for sample generation and model correction. We have clarified the specific processing steps in the revised Methods section as below (Lines 117-121):

“...FAOSTAT serves as the primary input for country-level statistics and acts as

the basis for corrections. To refine these statistics to the city level, we used the GLW4 dataset to calculate the proportional distribution of livestock across municipalities. These proportions were then applied to each year's national total from FAOSTAT, allowing for the generation of city-level reference data to guide stratified sampling and to rescale model outputs..."

We acknowledge the uncertainty that this method may introduce, particularly due to the assumption that subnational distributions remain temporally stable. To assess its validity, we conducted further validation using multi-year subnational statistics (Figures 5 and 6). These comparisons demonstrate that the resulting time series preserve reasonable temporal dynamics, despite the use of a single-year GLW4 dataset as a reference.

Moreover, this assumption of spatial stability is consistent with many previous studies. For example, Van Boeckel et al. (2019) [<https://doi.org/10.1126/science.aaw1944>] used 2010 GLW data to assess global antimicrobial resistance in livestock without altering the spatial distribution across years, implying that the baseline livestock distribution was relatively stable for cross-year comparisons. Similarly, Theobald et al. (2020) [<https://doi.org/10.5194/essd-12-1953-2020>], in their study on global human modification from 1990 to 2017, employed a static livestock layer over multiple years, treating livestock pressure zones as relatively stable spatial variables. These examples indicate that the spatial distribution of livestock, tends to remain coherent over time, especially when constrained by agroecological, infrastructural, and cultural factors.

To ensure transparency, we have further discussed this potential source of uncertainty in the revised Discussion section and explicitly cautioned users regarding the assumptions made in the temporal allocation of livestock distributions (Lines 315-319):

"To enable global-scale and long-term consistency, our study adopted a proportion-based downscaling approach using the GLW4 dataset to redistribute FAOSTAT national totals at city level. While this method assumes relative stability in subnational livestock distributions across time, which may introduce uncertainty in dynamic regions, it is supported by previous large-scale studies (Theobald et al., 2020; Van Boeckel et al., 2019). Nevertheless, we recommend that users exercise caution when applying these data in regions with known subnational shifts in production systems."

***Comment 4.*** Based on the difference in feeding systems, authors categorize animals into "grazing livestock" (e.g., buffalo, cattle, goats, horses, sheep) and "captive livestock" (e.g., chickens, ducks, pigs), and assume grazing species inhabit grasslands while captive species are confined to impervious surfaces (Lines 83–85). This assertion appears questionable, as intensively raised animals often occupy peri-urban or rural agricultural lands (<https://doi.org/10.1016/j.oneear.2023.08.012>).

**Response:** Thanks for this important observation and for recommending reference. In direct response to this reference—and since the study focuses on pigs—we have chosen to illustrate our clarification using pig mapping as an example. Although we used

impervious surfaces as a component of the suitability mask for livestock, we concurrently applied a population density to remove dense urban centers from the suitable zones (Please kindly check Figure 1). This approach was designed to retain peri-urban and rural impervious areas, which are typically associated with livestock farming operations.

To demonstrate this approach, we added a representative figure showing pig density mapping in Jiangsu Province, China (see figure below). In the left panel, areas with high pig density in 2021 are shown, and it is clear that densely populated coastal cities (e.g., cities on the east coast) were excluded from the suitability area. In the right panels, a representative pig farm is outlined in a white circle. This farm is located in a peri-urban area and is mapped as impervious surface (red pixels) in the land cover product. Notably, it is surrounded by rural agricultural lands (orange pixels), and its location aligns with a high-density zone in the pig distribution map. This example proves that our strategy is able to capture livestock production zones located in peri-urban agricultural landscapes.

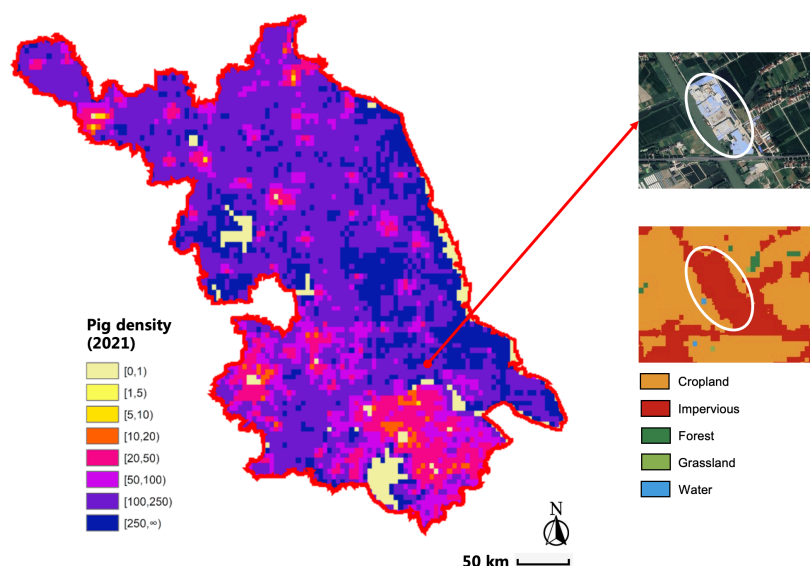

**Comment 5.** *The discussion is not very adequate. (1) For instance, the claim that vegetation omission minimally impacts predictions (Lines 280–281) is counterintuitive. What underlying reasons justify this assertion? Have other studies observed similar patterns? Is it premised on the assumption that grasslands or impervious surfaces serve as “theoretical suitable masks” for livestock distribution (Lines 83–85)? (2) Additionally, Figure 4 shows marked disparities in prediction accuracy across species (notably lower for cattle and higher for horses). What factors explain these variations?*

**Response:** Thanks for the comment. Following the suggestions of both reviewers, we have expanded the discussion to more fully address the uncertainty of our mapping product and the contributions of different predictor groups. Regarding the two specific questions raised in this comment, we respond as follows.

(1) Based on our sensitivity analysis (Figure 7), omitting vegetation-related features led to only a marginal decrease in prediction accuracy, especially when compared to the exclusion of climate and soil variables. Several factors may explain

this result. First, in global-scale models where spatial resolution is relatively coarse, vegetation indices—especially those derived from satellite imagery—tend to be temporally noisy and strongly affected by seasonality and land use dynamics, reducing their predictive reliability compared to more stable features such as climate and terrain.

Second, as the reviewer kindly pointed out, our use of land-cover-based "suitability masks" (e.g., impervious surfaces and grasslands) already filters the spatial domain in a way that may absorb some vegetation-related variation, thereby reducing the marginal effect of vegetation features. A similar pattern was observed in a recent study. Parente et al. (2025) noted: "This may be explained by the fact that we only consider the fraction of forested land within areas suitable for livestock." (<https://doi.org/10.21203/rs.3.rs-6201916/v1>).

To further analyze the contribution of individual features to prediction outcomes, we followed the other reviewer's recommendation and performed a Partial Dependence Plot (PDP) analysis. The results, presented in Supplementary Figures S1 and S2, show a positive association between vegetation features and livestock density. This conclusion has also been proved in the Figure 8 of Parente et al. (2025). The clarification has been added in the section of Discussion (Lines 290-305):

"...The relatively minor influence of anthropogenic and vegetation features may be attributed to spatial correlations between human activity indicators and the suitable mask (e.g., impervious surface layers), and the use of temporally static historical data before the years of 2000 and 1980."

"To further investigate the role of different input features and their influence on mapping outcomes, we performed Partial Dependence Plot (PDP) analyses using two representative livestock species: cattle and ducks. These species were selected due to their differing habitat preferences and spatial distributions, providing complementary perspectives on feature importance. The PDP results (Figures S1 and S2) reveal several consistent patterns, suggesting common influential factors of livestock distribution...Vegetation features (e.g. total number of valid vegetation cycles with peak) also display positive relationships with livestock density (Parente et al., 2025)."

(2) The observed variation in accuracy (e.g., lower for cattle, higher for horses) likely reflects differences in the ecological characteristics and management systems of each species. Grazing animals like cattle are typically associated with extensive pastoral systems that are more spatially diffuse and environmentally constrained, making them more difficult to model accurately. In contrast, horses tend to be concentrated around built environments (e.g., stables, equestrian facilities) and are often managed in more predictable locations, leading to higher model performance. Similar patterns were also found in Ehrmann et al. (2025), where prediction accuracy (measured by  $R^2$ ) was significantly higher for horses ( $R^2 = 0.530$ ) than for cattle ( $R^2 = 0.437$ ). We have included this explanation in the updated model accuracy assessment section of the manuscript (Lines 234-238):

"This variation in model performance across livestock species can be partly attributed to differences in their spatial distribution patterns and management systems. Cattle, as a grazing species, are often raised in extensive and environmentally heterogeneous systems, making their spatial patterns more diffuse and harder to predict

accurately. In contrast, horses are typically managed in more spatially concentrated settings, leading to more spatially clustered distributions and better model fit.”
